# **Morphological variation in *Blommersia* pelvic shape coincides with muscular architecture and parallels genus phylogenetic evolution**

Javier H. Santos-Santos<sup>1,2,\*</sup>, Mireia Guinovart-Castán<sup>1</sup>, David R. Vieites<sup>1</sup>

<sup>1</sup> *Department of Biogeography and Global Change (BGC-MNCN-CSIC), Museo Nacional de Ciencias Naturales, C/José Gutiérrez Abascal 2, E-28006, Madrid, Spain.*

<sup>2</sup> *Department of Animal Biology, University of Barcelona, Avenida Diagonal 645, 08028, Barcelona, Spain.*

\*Email: [jssantos@usal.es](mailto:jssantos@usal.es)

"This manuscript has been withdrawn by the authors as it was submitted without appropriate permission. If you have any questions, please contact the corresponding author."
